# Supplementary material for: COVID-19 pandemic in Djibouti: Epidemiology and the response strategy followed to contain the virus during the first two months, 17 March to 16 May 2020
Source: PLoS One. 2020 Dec 22;15(12):e0243698. doi: 10.1371/journal.pone.0243698 (PMC7755209; doi:10.1371/journal.pone.0243698)
Supplement: S1 Dataset — (XLSX) [file pone.0243698.s001.xlsx]

## Sheet: Data set_Djibouti
	Month	Epi week	Date	Number of people tested	Results		Deaths
					Positive	Negative
	March	W12	2020-03-15	0	0	0	0
			2020-03-16	0	0	0	0
			2020-03-17	9	1	9	0
			2020-03-18	3	0	2	0
			2020-03-19	35	0	35	0
			2020-03-20	75	0	75	0
			2020-03-21	33	0	33	0
		W13	2020-03-22	11	2	9	0
			2020-03-23	33	0	33	0
			2020-03-24	2	9	2	0
			2020-03-25	17	0	8	0
			2020-03-26	20	1	19	0
			2020-03-27	43	2	41	0
			2020-03-28	195	4	191	0
		W14	2020-03-29	144	7	137	0
			2020-03-30	195	5	190	0
			2020-03-31	218	3	215	0
	April		2020-04-01	204	7	197	0
			2020-04-02	162	9	153	0
			2020-04-03	65	1	64	0
			2020-04-04	252	8	244	0
		W15	2020-04-05	513	31	482	0
			2020-04-06	450	31	419	0
			2020-04-07	427	14	413	0
			2020-04-08	293	5	288	1
			2020-04-09	341	10	331	0
			2020-04-10	277	37	240	1
			2020-04-11	434	28	406	0
		W16	2020-04-12	498	83	415	0
			2020-04-13	407	65	342	0
			2020-04-14	580	72	508	0
			2020-04-15	494	156	338	0
			2020-04-16	1056	141	915	0
			2020-04-17	0	0	0	0
			2020-04-18	658	114	544	0
		W17	2020-04-19	0	0	0	0
			2020-04-20	811	99	712	0
			2020-04-21	1317	29	1288	0
			2020-04-22	347	12	335	0
			2020-04-23	471	13	458	0
			2020-04-24	341	9	332	0
			2020-04-25	310	15	295	0
		W18	2020-04-26	509	12	497	0
			2020-04-27	321	37	284	0
			2020-04-28	414	5	409	0
			2020-04-29	437	12	425	0
			2020-04-30	329	8	321	0
	May		2020-05-01	105	15	90	0
			2020-05-02	0	2	0	0
		W19	2020-05-03	366	2	362	0
			2020-05-04	156	4	152	0
			2020-05-05	160	4	156	1
			2020-05-06	213	9	204	0
			2020-05-07	106	2	104	0
			2020-05-08	199	54	145	0
			2020-05-09	248	21	227	0
		W20	2020-05-10	486	17	469	0
			2020-05-11	303	29	274	0
			2020-05-12	331	12	319	0
			2020-05-13	223	16	207	0
			2020-05-14	231	25	206	1
			2020-05-15	228	22	206	0
			2020-05-16	426	70	356	0
	Total			17532	1401	16131	4
